# Supplementary material for: Differential Salt Tolerance Strategies in Three Halophytes from the Same Ecological Habitat: Augmentation of Antioxidant Enzymes and Compounds
Source: MDPI journal article supplement (doi:10.3390/plants10061100), 2021-05-30
Supplement: s1 [file s1]

## Supplementary Material

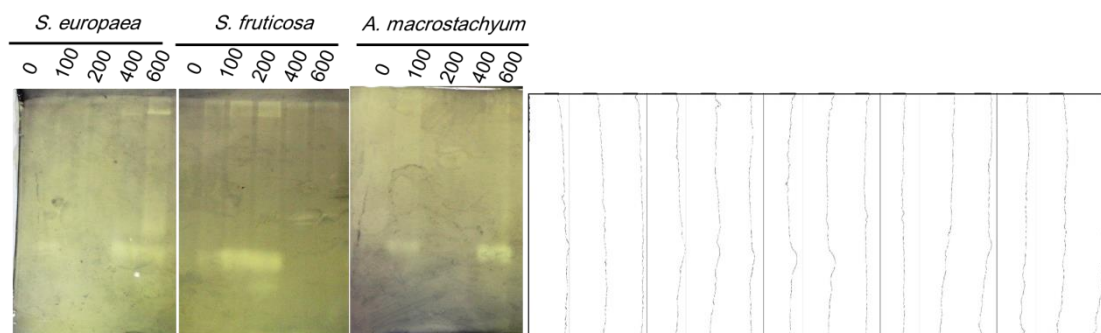

**Figure S1.** Superoxide dismutase isozymes of *S. europaea*, *S. fruticosa* and *A. macrostachyum* under different NaCl concentrations.

**Table S1.** The correlation coefficient of growth parameters (shoot fresh weight: SFW, root fresh weight: RFW, shoot dry weight: SDW, root dry weight: RDW), Chl a, Chl b, Chl a/b, carotenoids: Car, Proline: pro, malondialdehyde: MDA, phenolics: Phe, Flavonoids: Flav. in *Arthrocnemum macrostachyum*, *Sarcocornia fruticosa* and *Salicornia europaea* under salinity treatments.

|                                   | SFW       | RFW       | SDW       | RDW       | Chla     | Chlb      | Chlab     | Car       | Pro       | MDA       | Phe       | Flav      |
|-----------------------------------|-----------|-----------|-----------|-----------|----------|-----------|-----------|-----------|-----------|-----------|-----------|-----------|
| <i>Arthrocnemum macrostachyum</i> |           |           |           |           |          |           |           |           |           |           |           |           |
| SFW                               | 1         | 0.864 **  | 0.965 **  | 0.961 **  | 0.029    | 0.433     | −0.466    | −0.837 ** | −0.824 ** | −0.357    | −0.748 ** | −0.844 ** |
| RFW                               | 0.864 **  | 1         | 0.837 **  | 0.862 **  | −0.068   | 0.667 **  | −0.723 ** | −0.893 ** | −0.908 ** | −0.724 ** | −0.930 ** | −0.950 ** |
| SDW                               | 0.965 **  | 0.837 **  | 1         | 0.969 **  | −0.033   | 0.386     | −0.450    | −0.796 ** | −0.778 ** | −0.302    | −0.741 ** | −0.832 ** |
| RDW                               | 0.961 **  | 0.862 **  | 0.969 **  | 1         | −0.028   | 0.484     | −0.548 *  | −0.819 ** | −0.824 ** | −0.358    | −0.783 ** | −0.848 ** |
| Chla                              | 0.029     | −0.068    | −0.033    | −0.028    | 1        | 0.283     | 0.130     | −0.213    | −0.202    | −0.166    | −0.007    | 0.146     |
| Chlb                              | 0.433     | 0.667 **  | 0.386     | 0.484     | 0.283    | 1         | −0.910 ** | −0.704 ** | −0.824 ** | −0.820 ** | −0.792 ** | −0.695 ** |
| Chlab                             | −0.466    | −0.723 ** | −0.450    | −0.548 *  | 0.130    | −0.910 ** | 1         | 0.641 **  | 0.777 **  | 0.735 **  | 0.820 **  | 0.795 **  |
| Car                               | −0.837 ** | −0.893 ** | −0.796 ** | −0.819 ** | −0.213   | −0.704 ** | 0.641 **  | 1         | 0.943 **  | 0.711 **  | 0.848 **  | 0.832 **  |
| Pro                               | −0.824 ** | −0.908 ** | −0.778 ** | −0.824 ** | −0.202   | −0.824 ** | 0.777 **  | 0.943 **  | 1         | 0.749 **  | 0.906 **  | 0.859 **  |
| MDA                               | −0.357    | −0.724 ** | −0.302    | −0.358    | −0.166   | −0.820 ** | 0.735 **  | 0.711 **  | 0.749 **  | 1         | 0.778 **  | 0.636 *   |
| Phe                               | −0.748 ** | −0.930 ** | −0.741 ** | −0.783 ** | −0.007   | −0.792 ** | 0.820 **  | 0.848 **  | 0.906 **  | 0.778 **  | 1         | 0.891 **  |
| Flav                              | −0.844 ** | −0.950 ** | −0.832 ** | −0.848 ** | 0.146    | −0.695 ** | 0.795 **  | 0.832 **  | 0.859 **  | 0.636 *   | 0.891 **  | 1         |
| <i>Sarcocornia fruticosa</i>      |           |           |           |           |          |           |           |           |           |           |           |           |
| SFW                               | 1         | 0.958 **  | 0.972 **  | 0.863 **  | 0.338    | 0.022     | 0.174     | −0.806 ** | −0.636 *  | −0.710 ** | −0.094    | −0.555 *  |
| RFW                               | 0.958 **  | 1         | 0.980 **  | 0.942 **  | 0.423    | 0.218     | 0.023     | −0.887 ** | −0.761 ** | −0.812 ** | −0.197    | −0.469    |
| SDW                               | 0.972 **  | 0.980 **  | 1         | 0.923 **  | 0.439    | 0.078     | 0.153     | −0.840 ** | −0.704 ** | −0.726 ** | −0.102    | −0.609 *  |
| RDW                               | 0.863 **  | 0.942 **  | 0.923 **  | 1         | 0.539 *  | 0.302     | −0.016    | −0.888 ** | −0.811 ** | −0.750 ** | −0.042    | −0.482    |
| Chla                              | 0.338     | 0.423     | 0.439     | 0.539 *   | 1        | 0.092     | 0.378     | −0.333    | −0.383    | −0.220    | −0.026    | −0.506    |
| Chlb                              | 0.022     | 0.218     | 0.078     | 0.302     | 0.092    | 1         | −0.878 ** | −0.448    | −0.713 ** | −0.650 ** | −0.207    | 0.473     |
| Chlab                             | 0.174     | 0.023     | 0.153     | −0.016    | 0.378    | −0.878 ** | 1         | 0.218     | 0.482     | 0.453     | 0.180     | −0.649 ** |
| Car                               | −0.806 ** | −0.887 ** | −0.840 ** | −0.888 ** | −0.333   | −0.448    | 0.218     | 1         | 0.847 **  | 0.888 **  | 0.138     | 0.170     |
| Pro                               | −0.636 *  | −0.761 ** | −0.704 ** | −0.811 ** | −0.383   | −0.713 ** | 0.482     | 0.847 **  | 1         | 0.879 **  | 0.163     | 0.121     |
| MDA                               | −0.710 ** | −0.812 ** | −0.726 ** | −0.750 ** | −0.220   | −0.650 ** | 0.453     | 0.888 **  | 0.879 **  | 1         | 0.245     | −0.017    |
| Phe                               | −0.094    | −0.197    | −0.102    | −0.042    | −0.026   | −0.207    | 0.180     | 0.138     | 0.163     | 0.245     | 1         | −0.278    |
| Flav                              | −0.555 *  | −0.469    | −0.609 *  | −0.482    | −0.506   | 0.473     | −0.649 ** | 0.170     | 0.121     | −0.017    | −0.278    | 1         |
| <i>Salicornia europaea</i>        |           |           |           |           |          |           |           |           |           |           |           |           |
| SFW                               | 1         | 0.618 *   | 0.833 **  | 0.874 **  | 0.712 ** | 0.687 **  | −0.098    | 0.507     | −0.903 ** | −0.131    | −0.047    | −0.110    |

|       |           |           |           |           |           |           |          |           |           |           |           |          |
|-------|-----------|-----------|-----------|-----------|-----------|-----------|----------|-----------|-----------|-----------|-----------|----------|
| RFW   | 0.618 *   | 1         | 0.555 *   | 0.718 **  | 0.643 **  | 0.158     | 0.512    | 0.819 **  | -0.686 ** | 0.397     | -0.272    | 0.608 *  |
| SDW   | 0.833 **  | 0.555 *   | 1         | 0.854 **  | 0.699 **  | 0.576 *   | 0.019    | 0.443     | -0.822 ** | -0.037    | 0.039     | 0.098    |
| RDW   | 0.874 **  | 0.718 **  | 0.854 **  | 1         | 0.845 **  | 0.646 **  | 0.122    | 0.646 **  | -0.937 ** | 0.112     | -0.006    | 0.195    |
| Chla  | 0.712 **  | 0.643 **  | 0.699 **  | 0.845 **  | 1         | 0.664 **  | 0.306    | 0.731 **  | -0.885 ** | 0.192     | -0.130    | 0.242    |
| Chlb  | 0.687 **  | 0.158     | 0.576 *   | 0.646 **  | 0.664 **  | 1         | -0.504   | 0.280     | -0.709 ** | -0.005    | -0.091    | -0.342   |
| Chlab | -0.098    | 0.512     | 0.019     | 0.122     | 0.306     | -0.504    | 1        | 0.489     | -0.095    | 0.265     | -0.064    | 0.732 ** |
| Car   | 0.507     | 0.819 **  | 0.443     | 0.646 **  | 0.731 **  | 0.280     | 0.489    | 1         | -0.754 ** | 0.638 *   | -0.639 *  | 0.602 *  |
| Pro   | -0.903 ** | -0.686 ** | -0.822 ** | -0.937 ** | -0.885 ** | -0.709 ** | -0.095   | -0.754 ** | 1         | -0.178    | 0.254     | -0.132   |
| MDA   | -0.131    | 0.397     | -0.037    | 0.112     | 0.192     | -0.005    | 0.265    | 0.638 *   | -0.178    | 1         | -0.670 ** | 0.664 ** |
| Phe   | -0.047    | -0.272    | 0.039     | -0.006    | -0.130    | -0.091    | -0.064   | -0.639 *  | 0.254     | -0.670 ** | 1         | -0.331   |
| Flav  | -0.110    | 0.608 *   | 0.098     | 0.195     | 0.242     | -0.342    | 0.732 ** | 0.602 *   | -0.132    | 0.664 **  | -0.331    | 1        |

\* Correlation is significant at the 0.05 level (2-tailed). \*\* Correlation is significant at the 0.01 level (2-tailed).
